# Supplementary material for: Sex Differences Between Female and Male Individuals in Antipsychotic Efficacy and Adverse Effects in the Treatment of Schizophrenia
Source: PubMed Central journal article supplement — CNS Drugs. 2024 May 7;38(7):559–70. doi: 10.1007/s40263-024-01089-w (PMC11182865; doi:10.1007/s40263-024-01089-w), 2024-05-07
Supplement: 40263_2024_1089_MOESM1_ESM.pdf [file 40263_2024_1089_MOESM1_ESM.pdf]

**Title:** Sex differences between females and males in antipsychotic medication efficacy and adverse effects in the treatment of schizophrenia

**Short title:** Sex differences and antipsychotics

**Journal:** CNS Drugs

**Authors:**

**Megan Galbally**<sup>1,2</sup> ORCID [0000-0003-3909-1918](https://orcid.org/0000-0003-3909-1918)

**Karen Wynter**<sup>1,3</sup> ORCID [0000-0003-4620-7691](https://orcid.org/0000-0003-4620-7691)

**Dan Siskind**<sup>4,5</sup> ORCID [0000-0002-2072-9216](https://orcid.org/0000-0002-2072-9216)

**Christoph U. Correll**<sup>6,7,8,9</sup> ORCID [0000-0002-7254-5646](https://orcid.org/0000-0002-7254-5646)

**Korinne Northwood**<sup>4,5</sup> ORCID [0000-0001-6268-547X](https://orcid.org/0000-0001-6268-547X)

**Susanna Every-Palmer**<sup>10</sup> ORCID [0000-0001-6455-9741](https://orcid.org/0000-0001-6455-9741)

**Affiliations:**

1. School of Clinical Sciences, Monash University, Australia
2. Health Futures Institute, Murdoch University, Australia
3. Faculty of Health, Deakin University, Australia
4. Faculty of Medicine, The University of Queensland, Brisbane, Australia
5. Metro South Addiction and Mental Health Hospital and Health Service, Brisbane, Australia
6. Department of Psychiatry, The Zucker Hillside Hospital, Northwell Health, Glen Oaks, NY, USA
7. Department of Psychiatry and Molecular Medicine, Donald and Barbara Zucker School of Medicine at Hofstra/Northwell, Hempstead, NY, USA
8. Department of Child and Adolescent Psychiatry, Charité Universitätsmedizin Berlin, Berlin, Germany
9. German Center for Mental Health (DZPG), partner site Berlin, Germany
10. Department of Psychological Medicine, University of Otago Wellington, New Zealand

**Address Correspondence to:** Professor Megan Galbally, [megan.galbally@monash.edu](mailto:megan.galbally@monash.edu)

Supplementary Table 1: Number (percentage) of participants in PANNS categories by gender at baseline

|                                                      | Women n (%) | Men n (%)  | $p^1$ | Cramer's V |
|------------------------------------------------------|-------------|------------|-------|------------|
| 1 = PANSS total score values 30-49                   | 66 (96.2)   | 30 (8.0)   |       |            |
| 2 = PANSS total score values 50-69                   | 316 (29.5)  | 110 (29.4) |       |            |
| 3 = PANSS total score values 70-89                   | 465 (43.3)  | 149 (39.8) | 0.543 | 0.046      |
| 4 = PANSS total score values 90-109                  | 198 (18.5)  | 72 (19.3)  |       |            |
| 5 = PANSS total score values $\geq 110$              | 28 (2.6)    | 13 (3.5)   |       |            |
| 1 = PANSS positive score 7-13                        | 202 (18.8)  | 80 (21.4)  |       |            |
| 2 = PANSS positive score values 14-20                | 493 (45.9)  | 160 (42.8) |       |            |
| 3 = PANSS positive score values 21-28                | 325 (30.3)  | 121 (32.4) | 0.356 | 0.047      |
| 4 = PANSS positive score values $> 28$               | 53 (4.9)    | 13 (3.5)   |       |            |
| 1 = PANSS negative score values 7-13                 | 165 (15.4)  | 79 (21.1)  |       |            |
| 2 = PANSS positive score values 14-20                | 389 (36.3)  | 134 (35.8) |       |            |
| 3 = PANSS positive score values 21-28                | 403 (37.6)  | 123 (32.9) | 0.065 | 0.071      |
| 4 = PANSS positive score values $> 28$               | 116 (10.8)  | 38 (10.2)  |       |            |
| 1 = PANSS general psychopathology score values 16-29 | 233 (21.7)  | 85 (22.7)  |       |            |
| 2 = PANSS general psychopathology values 30-39       | 440 (41.0)  | 141 (37.7) |       |            |
| 3 = PANSS general psychopathology values 40-49       | 308 (28.7)  | 107 (28.6) | 0.456 | 0.042      |
| 4 = PANSS general psychopathology values $\geq 50$   | 92 (8.6)    | 41 (11.0)  |       |            |

PANSS: Positive and Negative Syndrome Scale; SD: standard deviation

<sup>1</sup>  $p$ -values and effect sizes associated with  $\chi^2$  tests
