# Supplementary material for: Sex Differences Between Female and Male Individuals in Antipsychotic Efficacy and Adverse Effects in the Treatment of Schizophrenia
Source: PubMed Central journal article supplement — CNS Drugs. 2024 May 7;38(7):559–70. doi: 10.1007/s40263-024-01089-w (PMC11182865; doi:10.1007/s40263-024-01089-w), 2024-05-07
Supplement: 40263_2024_1089_MOESM3_ESM.pdf [file 40263_2024_1089_MOESM3_ESM.pdf]

**Title:** Sex differences between females and males in antipsychotic medication efficacy and adverse effects in the treatment of schizophrenia

**Short title:** Sex differences and antipsychotics

**Journal:** CNS Drugs

**Authors:**

**Megan Galbally**<sup>1,2</sup> ORCID [0000-0003-3909-1918](https://orcid.org/0000-0003-3909-1918)

**Karen Wynter**<sup>1,3</sup> ORCID [0000-0003-4620-7691](https://orcid.org/0000-0003-4620-7691)

**Dan Siskind**<sup>4,5</sup> ORCID [0000-0002-2072-9216](https://orcid.org/0000-0002-2072-9216)

**Christoph U. Correll**<sup>6,7,8,9</sup> ORCID [0000-0002-7254-5646](https://orcid.org/0000-0002-7254-5646)

**Korinne Northwood**<sup>4,5</sup> ORCID [0000-0001-6268-547X](https://orcid.org/0000-0001-6268-547X)

**Susanna Every-Palmer**<sup>10</sup> ORCID [0000-0001-6455-9741](https://orcid.org/0000-0001-6455-9741)

**Affiliations:**

1. School of Clinical Sciences, Monash University, Australia
2. Health Futures Institute, Murdoch University, Australia
3. Faculty of Health, Deakin University, Australia
4. Faculty of Medicine, The University of Queensland, Brisbane, Australia
5. Metro South Addiction and Mental Health Hospital and Health Service, Brisbane, Australia
6. Department of Psychiatry, The Zucker Hillside Hospital, Northwell Health, Glen Oaks, NY, USA
7. Department of Psychiatry and Molecular Medicine, Donald and Barbara Zucker School of Medicine at Hofstra/Northwell, Hempstead, NY, USA
8. Department of Child and Adolescent Psychiatry, Charité Universitätsmedizin Berlin, Berlin, Germany
9. German Center for Mental Health (DZPG), partner site Berlin, Germany
10. Department of Psychological Medicine, University of Otago Wellington, New Zealand

**Address Correspondence to:** Professor Megan Galbally, [megan.galbally@monash.edu](mailto:megan.galbally@monash.edu)

Supplementary Table 3: Change in PANSS scores (Baseline to End of Phase) by sex, within each treatment group

|              |                               | Total n | Females |       |    | Males |       |     | <i>p</i> <sup>1</sup> | <i>d</i> |
|--------------|-------------------------------|---------|---------|-------|----|-------|-------|-----|-----------------------|----------|
|              |                               |         | Mean    | SD    | n  | Mean  | SD    | n   |                       |          |
| Olanzapine   | Total score                   | 239     | -8.39   | 18.12 | 70 | -5.93 | 15.81 | 169 | 0.223                 | 0.079    |
|              | Positive Scale                | 239     | -2.66   | 5.11  | 70 | -2.33 | 4.89  | 169 | 0.704                 | 0.025    |
|              | Negative Scale                | 239     | -2.14   | 6.65  | 70 | -1.15 | 6.29  | 169 | 0.226                 | 0.078    |
|              | General Psychopathology scale | 239     | -3.59   | 9.14  | 70 | -2.44 | 8.1   | 169 | 0.241                 | 0.076    |
| Perphenazine | Total score                   | 200     | -9.33   | 18.9  | 49 | -0.13 | 16.89 | 151 | 0.002                 | 0.215    |
|              | Positive Scale                | 200     | -2.04   | 6.8   | 49 | -0.36 | 5.94  | 151 | 0.209                 | 0.089    |
|              | Negative Scale                | 200     | -2.65   | 6.25  | 49 | -0.23 | 5.28  | 151 | 0.006                 | 0.196    |
|              | General Psychopathology scale | 200     | -4.63   | 9.5   | 49 | 0.46  | 9.11  | 151 | 0.002                 | 0.216    |
| Quetiapine   | Total score                   | 246     | -1.74   | 14.86 | 57 | 0.15  | 79.9  | 189 | 0.556                 | 0.038    |
|              | Positive Scale                | 247     | -0.63   | 4.02  | 57 | 0.44  | 6.34  | 190 | 0.375                 | 0.057    |
|              | Negative Scale                | 247     | -0.56   | 5.85  | 57 | -0.31 | 6.01  | 190 | 0.634                 | 0.003    |
|              | General Psychopathology scale | 246     | -0.54   | 8.05  | 57 | 0.02  | 9.36  | 189 | 0.707                 | 0.024    |
| Risperidone  | Total score                   | 253     | 0.88    | 17.84 | 69 | -2.71 | 19.87 | 184 | 0.092                 | -0.106   |
|              | Positive Scale                | 254     | 0.76    | 6.03  | 70 | -0.8  | 6.07  | 184 | 0.056                 | -0.120   |
|              | Negative Scale                | 254     | -0.03   | 6.4   | 70 | -0.22 | 6.65  | 184 | 0.778                 | -0.018   |
|              | General Psychopathology scale | 253     | 0.77    | 10.02 | 69 | -1.68 | 10.28 | 184 | 0.064                 | -0.117   |
| Ziprasidone  | Total score                   | 166     | 0.13    | 19.67 | 38 | 1.41  | 16.53 | 128 | 0.958                 | 0.004    |
|              | Positive Scale                | 166     | 1.11    | 8.04  | 38 | -0.02 | 5.73  | 128 | 0.275                 | -0.085   |
|              | Negative Scale                | 166     | -0.55   | 5.94  | 38 | 0.54  | 5.34  | 128 | 0.324                 | 0.077    |
|              | General Psychopathology scale | 166     | -0.42   | 8.21  | 38 | 1.07  | 8.81  | 128 | 0.678                 | 0.032    |

PANSS: Positive and Negative Syndrome Scale; SD: standard deviation

<sup>1</sup> *p*-values and effect sizes associated with Mann-Whitney U tests
